# Supplementary material
Source: publisher site journal article supplement (https://www.degruyterbrill.com/publication/isbn/9783839405499/downloadAsset/9783839405499_Leseprobe.pdf)
Supplement: Supplementary file 1 [file 9783839405499_Leseprobe.pdf]

# Momente der Prostitution. Eine Einführung<sup>1</sup>

---

SABINE GRENZ/MARTIN LÜCKE

»[...] um den Vernichtungskampf gegen die Prostitution zu einem erfolgreichen Ende zu führen, bedarf es einer wirklichen Erkenntnis des wahren Wesens der Prostitution als eines merkwürdigen Ueberrestes des primitiven Geschlechtslebens, bedarf es ferner einer tief eindringenden Erforschung ihres Kausalzusammenhangs mit der antik-mittelalterlichen Sexualethik, bedarf es endlich einer neuen Ethik im Sinne der Anerkennung der Sexualität als einer natürlichen biologischen Erscheinung und ihrer Anpassung an die moderne Kultur durch die Ausprägung der Begriffe Arbeit, der Verantwortlichkeit und der relativen sexuellen Abstinenz.«<sup>2</sup>

Fast einhundert Jahre ist es her, dass Iwan Bloch 1912 mit diesen Worten die moderne, durch sexualwissenschaftliche Methoden angeleitete Erforschung der Prostitution eröffnete und den ersten Band seines umfassenden Handbuchs »Die Prostitution« vorlegte. Noch immer erstaunt das Buch durch seinen Materialreichtum und die Vielfalt der Quellen, die Bloch heranzog, doch der Ur-Ahn der Prostitutionsforschung würde sich heute bei einem Blick auf die gegenwärtige Forschungslandschaft erstaunt die Augen reiben: Von einem wissenschaftlich motivierten »Vernichtungskampf gegen die Prostitution« kann – zumindest in Deutschland – keine Rede mehr sein und nach wie vor gehört die »Prostitution zu unserer Gesellschaft und zu unserer Lebensweise [...] wie das Amen zur Kirche«.<sup>3</sup> Im Jahr 2001 verlor sie in Deutschland sogar den Status der Sitten-

---

1 | Diese Anthologie beruht auf der Tagung »Prostitution. Tauschhandel zwischen Körper und Zeichen«, die im März 2006 von dem durch die DFG geförderten Graduiertenkolleg »Geschlecht als Wissenskategorie« an der Humboldt-Universität zu Berlin durchgeführt wurde. Beides, die Tagung wie der Band, wurden durch Mittel des Graduiertenkollegs finanziert. Für die freundliche wie finanzielle Unterstützung möchten wir uns bei den beiden Sprecher/-inne/-n Christina von Braun und Volker Hess sowie Inge Stephan bedanken.

2 | Iwan Bloch: Die Prostitution Band I (Handbuch der gesamten Sexualwissenschaft in Einzeldarstellungen), Berlin 1912, S. XVI.

3 | Volkmars Sigusch: Neosexualitäten. Über den kulturellen Wandel von Liebe und Perversion, Frankfurt am Main/New York 2005, S. 196.

widrigkeit. Seitdem können sich Prostituierte in die staatliche Sozialversicherung aufnehmen lassen und ihren Lohn gerichtlich einklagen. Und keine Forscherin und kein Forscher unternimmt heute noch den Versuch, nach Überresten eines angeblich primitiven Geschlechtslebens oder den natürlich-biologischen Wurzeln der Sexualität zu fahnden. Seit Foucaults Werk »Sexualität und Wahrheit«, in dem er sowohl die »Natürlichkeit« als auch die »befreiende Kraft« der Sexualität in Frage stellte,<sup>4</sup> geraten diese zunehmend ins Visier der kritischen Wissenschaft:<sup>5</sup> Die *Gender Studies* zeigen auf, dass sexuelle Identitäten lediglich soziale Konstrukte sind und die *Queer Studies* schrecken nicht davor zurück, diese Identitäten vollends zu dekonstruieren. Und statt zu untersuchen, wie sich ein Wandel der Arbeitsverhältnisse auf die käufliche Sexualität ausgewirkt hat, konnte sich für Prostitution selbst der Begriff der »Sexarbeit« etablieren.<sup>6</sup>

Heute erstaunt am historischen Forschungsprogramm von Bloch jedoch besonders die leitende Hinsicht seines Projektes, »einer wirklichen Erkenntnis des wahren Wesens der Prostitution« nachzuspüren und auf diese Weise zum wahren Wissenskern über die Prostitution vorzudringen. In diesem Band wird ein ganz anderer Weg beschritten: Nicht um sicheres und endgültig wahres Wissen über die Prostitution soll es hier gehen, vielmehr gerät in den Blick, wie Prostitution ihrerseits als ein spannungsreiches Feld der Wissensproduktion und -reproduktion gewirkt hat. So wird hier betrachtet, wie die Prostitution bestehendes Wissen über Geld, Macht, Sexualität und Geschlecht praktiziert und damit reproduziert. Zum anderen wird dieses Wissen durch und in der Prostitution verändert und es wirkt von dort in andere gesellschaftliche Bereiche zurück. Prostitution wird so zum integralen Bestandteil der gesellschaftlichen Produktion, Aneignung und Reproduktion von geschlechtlich codiertem Wissen über Sexualität und Geschlecht, aber auch über Geld und die gesellschaftliche Konstruktion von Raum und Zeit.

Nach wie vor ist die Betrachtung der Prostitution ein eher randständiges wissenschaftliches Thema. Das Bloch'sche Forschungsparadigma konnte lange wirken und so war Prostitutionsforschung zunächst vornehmlich Devianzforschung.<sup>7</sup> Sie bezog sich fast einzig auf die Person der weiblichen Prostituierten.

4 | Vgl. Michel Foucault: Der Wille zum Wissen, Sexualität und Wahrheit Bd. 1, Frankfurt am Main 1997 [1983].

5 | 2003 organisierte die Universität Manchester z.B. eine Tagung, die sich speziell der Frage der »Sexualities after Foucault« zuwandte.

6 | Erst kürzlich widmete das Hamburger Museum der Arbeit der Prostitution eine große Ausstellung, die zur bestbesuchten Wechselausstellung in der Geschichte des Hauses wurde und verwendete dabei ganz selbstverständlich eben jenen Terminus der »Sexarbeit«, um über Geschichte und Gegenwart der Prostitution zu informieren.

7 | Vgl. auch Pierre Dufour: Weltgeschichte der Prostitution. Von den Anfängen bis zum Beginn des 20. Jahrhunderts, Reprint Frankfurt am Main 1995, hier Bd. 2, darin Bd. 3: Die christliche Zeit II, Teil 1, Kap. IV, S. 60ff. Dufour gibt hier einen Überblick über Kategorisierungen von Prostituierten in verschiedenen Studien des 19. und beginnenden 20. Jahrhunderts.

ten<sup>8</sup> und auf die Frage, warum sie überhaupt dieser Tätigkeit nachgeht. Zu diesem Zweck wurde z.B. ihr Körper vermessen oder ihre Tätowierungen wurden untersucht.<sup>9</sup> Es wurde die Frage diskutiert, inwiefern von »geborenen Prostituierten« gesprochen werden konnte, deren Tätigkeit mit der Hysterie zusammenhing.<sup>10</sup> Erst später kamen Studien über Freier hinzu, die teilweise ebenfalls deren Devianz in den Vordergrund stellten.<sup>11</sup> Diese Tendenz zog sich bis in die 1980er Jahre hinein hin und ist bis heute nicht gänzlich verschwunden.<sup>12</sup>

Dennoch hat sich in den letzten 30 Jahren einiges verändert. In den 1970er Jahren wurde die These entwickelt und propagiert, dass Frauen, die mit Prostitution ihr Geld verdienen, nicht als »deviant« bezeichnet werden können, sondern Opfer gesellschaftlicher Verhältnisse seien.<sup>13</sup> In diesem Zusammenhang wurde auch die Auffassung einflussreich, alle nicht-erwerbstätigen verheirateten Frauen als Prostituierte anzusehen, da auch sie als Folge von patriarchaler Herrschaft in der Ehe, die als eine staatlich legitimierte Form sozialer Ungleichheit interpretiert wurde, der freien Verfügungsgewalt über ihren Körper und ihre Sexualität beraubt waren.<sup>14</sup> Der politische Impetus dieses feministischen Paradigmenwechsels war auf eine Verbesserung der sozialen Stellung von Frauen insgesamt gerichtet. Gleichzeitig fand in den 1970er Jahren eine sexuelle Liberalisierung mitsamt den Befreiungsbewegungen sexueller Minderheiten statt. Zu diesen gehören nicht nur die Schwulen-, Lesben-, Bisexuellen- und Transsexuellenbewegungen, sondern auch die Hurenbewegung. Seither setzen sich organisierte Prostituierte (Huren, Sex-Arbeiter/-innen) gegen Vorurteile zur Wehr. Sie wollen nicht viktimisiert werden, sondern ihre Tätigkeit als Sex-Arbeit anerkannt wissen und nicht nur dann unterstützt werden, wenn sie aus ihrem Gewerbe »aussteigen« wollen.

8 | Wir gebrauchen die Ausdrücke »Sex-Arbeiterin«, »Hure« und »Prostituierte« als gleichwertige Begriffe; keiner von ihnen ist abwertend zu verstehen.

9 | Vgl. P. Dufour: Weltgeschichte der Prostitution, S. 60f.

10 | Vgl. ebd. S. 65 und Philipp Sarasin: Reizbare Maschinen. Eine Geschichte des Körpers 1765-1914, Frankfurt am Main 2001, S. 387f.

11 | Vgl. Doris Velten: Aspekte der sexuellen Sozialisation. Eine Analyse qualitativer Daten zu biographischen Entwicklungsmustern von Prostitutionskunden, Inauguraldissertation, Freie Universität Berlin 2004. Es gibt aber auch völlig entgegengesetzte Arbeiten wie etwa die von Dieter Offergold: Erscheinungsformen, Ursachen und Auswirkungen der Prostitution in Bochum, Diss. Bonn 1965, für den sich das männliche Begehren als völlig unproblematisch und naturgegeben darstellte.

12 | Vgl. Julia O'Connell Davidson: Prostitution, Power and Freedom, Cambridge (GB) 1998, S. 138ff. O'Connell Davidson untersucht Freier als »social necrophiliacs«.

13 | Vgl. z.B. Kate Millet: Das verkaufte Geschlecht. Die Frau zwischen Gesellschaft und Prostitution, München 1973.

14 | Vgl. z.B. Rose-Marie Giesen/Gunda Schumann: An der Front des Patriarchats. Bericht vom langen Marsch durch das Prostitutionsmilieu, Bensheim 1980.

Noch in den 1980er Jahren empfand der Soziologe Roland Girtler,<sup>15</sup> dass eine Studie mit Freiern nur schwerlich durchführbar sei, da »nur die wenigsten Kunden – vor allem die aus höheren sozialen Schichten –« zu einem Interview bereit sein würden. Doch bereits 1991 fertigte die Prostituiertenorganisation Hydra in Berlin eine Studie an,<sup>16</sup> an der sich Männer aus unterschiedlichen sozialen Schichten beteiligt hatten. Auch Dieter Kleiber und Doris Velten hatten keine Schwierigkeiten, für ihre Studien Probanden zu finden.<sup>17</sup> Seither wurden das Handeln und die Bedürfnisse der Freier aus zwei ganz unterschiedlichen Perspektiven interpretiert: im Rahmen der Psychoanalyse<sup>18</sup> und mithilfe von Robert W. Connells Konzept der hegemonialen Männlichkeit.<sup>19</sup> Weiterhin wurde die Beziehung von Freiersein und dem Verhalten zu HIV/Aids untersucht.<sup>20</sup> Zuletzt wurden Erzählungen von Freiern über ihre sexuellen Erlebnisse mit Sex-Arbeiterinnen unter der Frage analysiert, inwiefern der Prostitutionsbesuch dazu beiträgt, eine sexuelle und soziale Identität als »heterosexueller Mann« herzustellen.<sup>21</sup> Um dies herauszufinden, wurden die den Erzählungen inhärenten Bezüge zur (Wissens-)Geschichte der Sexualität, des Geldes und des Konsums herausgestellt. Dadurch wurde es möglich, anhand des empirischen Materials den kulturgeschichtlichen Hintergrund des Freierseins (zumindest in Deutschland) sichtbar werden zu lassen.

Doch auch das feministische Forschungsparadigma lässt wichtige Fragen offen, da es in erster Linie das Verhältnis zwischen weiblichen Prostituierten und männlichen Freiern sowie das von Männern dominierte System der Sex-Industrie diskutiert. Männliche Prostituierte werden dabei ebenso vernachlässigt wie Frauen als Zuhälterinnen oder Kundinnen.<sup>22</sup> Zudem wird die Diskussion bisher von heterosexuellen Perspektiven dominiert, so dass die homosexuelle Sex-Arbeit weitestgehend ignoriert wird. Dieser Umstand ist freilich auch dem Sprachbewusstsein geschuldet, denn in der deutschen Sprache scheinen die mann-männliche Prostitution und besonders männliche Prostituierte die Sphä-

15 | Vgl. Roland Girtler: *Der Strich: Sexualität als Geschäft*, München 1987, S. 183.

16 | Vgl. Hydra (Hg.): *Freier. Das heimliche Treiben der Männer*, Hamburg 1991.

17 | Vgl. Dieter Kleiber/Doris Velten: *Prostitutionskunden. Eine Untersuchung über soziale und psychologische Charakteristika von Besuchern weiblicher Prostituierter in Zeiten von Aids*, Bonn 1994 und D. Velten: *Aspekte der sexuellen Sozialisation*.

18 | Vgl. J. O'Connell Davidson: *Prostitution, Power and Freedom*.

19 | Vgl. Andrea Rothe: *Männer, Prostitution, Tourismus. Wenn Herren reisen ...*, Münster 1997 und Robert W. Connell: *Der gemachte Mann. Konstruktion und Krise von Männlichkeiten*, Opladen 2000.

20 | Vgl. D. Kleiber/D. Velten: *Prostitutionskunden*.

21 | Vgl. Sabine Grenz: *(Un)heimliche Lust. Über den Konsum sexueller Dienstleistungen*, Wiesbaden 2005.

22 | Vgl. Klaus de Albuquerque: »Sex, Beach Boys and Female Sex Tourists in the Caribbean«, in: B. M. Dank/R. Refinetti (Hg.), *Sex Work and Sex Workers*, London 1999, S. 87-111 und Jaqueline Sanchez Taylor: »A fine romance? Female Tourists' Sexual Behaviour in the Caribbean«, *Conference on Global Sexual Exploitation*, London: Institute of Commonwealth Studies 2000.

re des Verborgenen noch immer nicht verlassen zu haben. Der Duden zum Beispiel weist Prostituierten nur das weibliche Geschlecht zu, und während das Wörterbuch in der Bezeichnung des »Strichmädchens« eine umgangssprachliche, oft abwertende Bezeichnung für eine weibliche Prostituierte erkennt, wird ihr männliches Pendant, der »Stricher« bzw. »Strichjunge«, keiner begrifflichen Definition unterzogen.<sup>23</sup> So ist es nicht verwunderlich, dass sich bisher nur einzelne Studien und Einzelbeiträge auch mit der mann-männlichen Prostitution befassen, indem etwa der Zusammenhang mit HIV und Aids betrachtet wird<sup>24</sup> oder historische Debatten um dieses Phänomen in den *Men's* und *Gay Studies* verortet werden.<sup>25</sup> Dass die strikte Trennung in männliche und weibliche Sex-Arbeit und in Homo- und Heterosexualität, wie sie das Kennzeichen der aktuellen Forschung ist, jedoch kein ahistorisch-universelles Phänomen darstellt, hat zuletzt James N. Davidson in seiner Studie »Kurtisanen und Meeresfrüchte« am Beispiel des klassischen Athens gezeigt.<sup>26</sup>

Im Laufe dieser hier nur kurz angerissenen Entwicklung hat sich ein Wissensfeld um die Prostitution entwickelt, das nach wie vor zwei grundsätzliche Positionen erkennen lässt: die eine befürwortet sie, und die andere möchte sie am liebsten abgeschafft sehen.<sup>27</sup> Während radikale Feministinnen wie Sheila Jeffreys grundsätzlich von Prostitution als einer »harmful cultural practice« sprechen, gehen andere davon aus, dass sie im Regelfall eine Dienstleistung sei. Beide Ansichten sind politisch einflussreich: Sheila Jeffreys hat die schwedische Regierung beraten,<sup>28</sup> die 1999 ihr Prostitutionsgesetz veränderte und Freier kriminalisierte, während etwa zur selben Zeit die Prostitutionsgesetze in

23 | Vgl. Dudenredaktion (Hg.): Duden. Band 1: Die deutsche Rechtschreibung. 23., völlig neu bearbeitete Auflage, Mannheim 2004, S. 591, 716.

24 | Vgl. z.B. Michael T. Wright: »Stricher-Leben. Sexuelle Dienstleistung oder Überlebensstrategie?« und Laura Méritt: »Club Rosa« und »Du kannst da spielen gehen, und das Geschlecht ist eigentlich egal«, in: Elisabeth v. Dücker (Hg.), Sexarbeit. Prostitution. Lebenswelten und Mythen, Bremen 2005, S. 124-127 (Merrit) und 133-135 (Wright).

25 | Vgl. Martin Lücke: »Männliche Prostitution in den Debatten um eine Reform des Sexualstrafrechts zu Beginn des 20. Jahrhunderts«, in: Invertito. Jahrbuch für die Geschichte der Homosexualitäten 5 (2003), S. 109-121; ders.: »Das ekle Geschmeiß« – Mann-männliche Prostitution und hegemoniale Männlichkeit im Kaiserreich, in: Martin Dinges (Hg.), Männer – Macht – Körper. Hegemoniale Männlichkeiten vom Mittelalter bis heute, Frankfurt am Main/New York 2005, S. 157-172.

26 | Vgl. James N. Davidson: Kurtisanen und Meeresfrüchte. Die verzehrenden Leidenschaften im klassischen Athen, Berlin 1999. Zum Werk von Davidson siehe auch Elke Hartmanns Beitrag in diesem Band.

27 | Zu dieser Gegenüberstellung der grundsätzlichen Positionen zur Prostitution vgl. Petra Schmackpfeffer: Frauenbewegung und Prostitution, <http://www.bis.uni-oldenburg.de/bisverlag/schfra89/inhalt.html>, 1989, S. 105-140, zuletzt gesehen am 02.II.2006.

28 | So Susanne Dodillet in ihrem Vortrag »Kulturschock Prostitution: Eine Analyse deutscher und schwedischer Prostitutionsdebatten der 1990er Jahre und ihrer Geschichte«, auf der Tagung »Prostitution. Tauschhandel zwischen Körper und Zeichen« am 17.03.2006 in der Humboldt-Universität zu Berlin.

Deutschland und den Niederlanden liberalisiert wurden, um den Sex-Arbeiter/-innen mehr Freiraum zu gewähren. In Schweden hat sich der Wunsch nach einer Abschaffung der Prostitution durchgesetzt, indem das Bezahlen für und die Inanspruchnahme von sexuellen Dienstleistungen strafbar gemacht wurde. In Deutschland wird sich hingegen von beiden Seiten aus für eine gesetzliche Regulierung der Prostitution zugunsten der Prostituierten eingesetzt, allerdings mit einem entsprechend unterschiedlichen Tenor. Auf beiden Seiten finden sich unter den Diskutierenden Frauen, die in der Prostitution arbeiten bzw. gearbeitet haben und solche, die diese Tätigkeit nie ausgeübt haben. In Großbritannien, den Niederlanden und Deutschland hat sich insgesamt eine pragmatische Haltung durchgesetzt, das heißt es gibt zwar nach wie vor Positionen, die der Prostitution und der Sex-Industrie insgesamt kritisch gegenüberstehen. Es herrscht aber gleichzeitig eine gewisse Einigkeit darüber, dass Prostituierte einen Anspruch auf gesellschaftliche Solidarität haben.<sup>29</sup> In den Niederlanden und in Deutschland zeigt sich der Pragmatismus im Umgang mit der Prostitution an der liberalisierten Rechtsprechung. In Großbritannien, wo die Rechtsprechung ähnlich ist wie in Deutschland vor 2001 (Prostitution ist unter Berücksichtigung bestimmter Regeln gestattet), äußert sich diese pragmatische Einstellung vor allem in der feministischen Forschung. Dass die verschiedenen Positionen zur Prostitution jedoch selten in Reinform auftreten, haben Rickard und Storr deutlich gemacht:

»The classic ways by which sex work is often understood either posit that commercialised sexuality indicates victimhood and vulnerability or that it is valid work and meaningful sexual expression for seller and buyer alike. In reality theses positions are rarely absolute either for sex workers or for those who undertake research, provide services or set policies. They are complicated by questions of power, desire, racism, sexism and economic inequity. At the same time different aspects of all these positions are often present in the same person's life.«<sup>30</sup>

Zunehmend, so scheint es, entstehen Arbeiten, in denen die Komplexität der Problematik »Prostitution« gesehen wird und in denen die Frauen und Männer, die in diesem Bereich arbeiten, nicht unbeschadet als Opfer, aber auch nicht einfach als freiwillige und glückliche Akteur/-innen gelten.

---

**29** | Vgl. hierzu z.B. Cornelia Filters: »Prostitution. Echt geil?«, in: Emma 1993, Heft 2, S. 36-57, in der eindeutig für eine Gesetzgebung zugunsten Prostituierter Stellung bezogen wird. Obwohl sich die Emma durchgängig gegen die Prostitution äußert, solidariert sie sich mit denjenigen Prostituierten, die die Verliererinnen des Geschäfts sind.

**30** | Wendy Rickard/Merl Storr: »Sex Work Reassessed«, in: Feminist Review 67, 2001, S. 1-4, hier S. 2.

## Die Beiträge dieses Bandes

Diese Anthologie widmet sich dem Austausch und der Präsentation aktueller Forschungsarbeiten zur Prostitution, die nicht das Ziel verfolgen, eine klare Position für oder gegen kommerzielle Sexualität einzunehmen, sondern sie als gesellschaftliches Phänomen zu untersuchen. Die Autorinnen arbeiten in unterschiedlichen Ländern und unterschiedlichen Disziplinen. Vertreten sind die Kulturwissenschaften, die Soziologie, die Politologie, die Kunstgeschichte, die Geschichtswissenschaften, die Germanistik und die *Gender Studies* aus Deutschland, den Niederlanden, Polen, Österreich, Schweden und den USA. Es handelt sich ausschließlich um akademische Arbeiten, weshalb uns der Vorwurf gemacht werden könnte, einmal mehr nur *über* Prostituierte zu sprechen, anstatt sie selbst zu Wort kommen zu lassen. Diese Kritik klingt vermutlich bei allen hier versammelten Beiträgen nach, denn in keinem Artikel werden direkte Aussagen über *die Prostituierte* getroffen. Vielmehr werden in einer Reihe von Aufsätzen gerade die Mechanismen aufgezeigt, durch die Prostituierte zum Schweigen gebracht wurden und werden.

Die Beiträge des Bandes zeigen, dass Prostitutionsforschung mittlerweile ein facettenreiches Arbeitsgebiet geworden ist. Dem doppelten Wortsinn von »Moment« Rechnung tragend, befassen sich die Beiträge zum einen mit speziellen Gesichtspunkten und zum anderen mit bestimmten historischen Momenten des Prostitutionsgeschäfts. Prostitution stellt keine gleichsam ahistorische Konstante dar, sondern ist als soziale Praktik stets eine zeittypische, also historische Antwort auf die gesellschaftlichen Rahmenbedingungen<sup>31</sup> und die etablierten Vorstellungen von so vielfältigen Aspekten wie denen des Geschlechts, der Sexualität, der *race*, der sozialen Schicht und anderen, indem sie diese reproduziert, aufricht oder zu überwinden vorgibt.

Konstitutiv für die Prostitution ist ihr Charakter als Tauschhandel zwischen Körperlichkeit und Sexualität auf der einen und materiellen Gegenleistungen auf der anderen Seite. Die Analyse dieses *Tauschhandels zwischen Körper und Zeichen* als Dreh- und Angelpunkt der Prostitution steht im Mittelpunkt der ersten Sektion des Bandes. Die Kulturwissenschaftlerin *Christina von Braun* betont in ihrem Artikel »Das Geld und die Prostitution« den engen Zusammenhang zwischen der Geschichte des Geldes und der Geschichte der Prostitution und stellt heraus, dass sowohl Geld als auch Sexualität Ressourcen waren (und sind), die gleichermaßen die Begierden zu entfesseln vermochten. Dass das Geld ständig bestrebt war, seine sexuelle Potenz zu zeigen, offenbart sich an den bemerkenswerten Parallelen zwischen der Geschichte des Geldes und der Geschichte der Prostitution. Letztere ging, wie das Geld, vom Tempel aus und verließ zeitgleich mit ihm den Raum des Heiligen, um sich in »der Welt« anzusiedeln. Je abstrakter das Geld wurde, desto wichtiger wurde die Prostitution, denn der käufliche Sexualekörper sollte als »Beleg« dafür dienen, dass das abstrakte Zeichensystem Geld in der Leiblichkeit selbst verankert ist. So wurde der Körper der Prosti-

31 | Vgl. Sybille Krafft: *Zucht und Unzucht: Prostitution und Sittenpolizei im München der Jahrhundertwende*, München 1996, S. 9.

tuieren quasi selbst zum Geldschein, zu einer Form der Materialisierung von Geld.

Wie die Historikerin *Elke Hartmann* in ihrem Beitrag »Hetären für die Lust?« Zum Hetärenwesen im klassischen Athen« zeigt, stand nicht immer der Austausch zwischen Sexualität und harter Währung im Vordergrund des Tauschhandels. Im Unterschied etwa zu den Straßen- und Bordellprostituierten, den so genannten *pornai*, erfüllte die Hetäre innerhalb der männlich dominierten Symposionskultur der klassisch-athenischen Gesellschaft die Funktion einer kostspieligen Begleiterin, deren Verbindung von Schönheit, Anmut, Liebesdienst und Gefälligkeit den männlichen Teilnehmern der Symposien Sozialprestige innerhalb der Symposionsgemeinschaft verlieh. Kennzeichen des Tauschhandels zwischen den Symposiasten und den Hetären war das Wahren des Anscheins einer Freiwilligkeit der Verbindung. Hetären, so betont Hartmann, erhielten auf doppelte Weise eine Sonderstellung unter den Frauen des klassischen Athens: Von den bürgerlichen Ehefrauen unterschieden sie sich durch ihr promiskues Sexualleben, von den gemeinen Bordell- und Straßenprostituierten durch ihren aufwendigen Lebensstil.

In ihrem Beitrag »... unter strenger Befolgung des Prinzips der Stundenmiete ... «. Die (un)heimliche Beziehung der Psychoanalyse zur Prostitution« geht die Kulturwissenschaftlerin *Bettina Mathes* der Frage nach, welche Übereinstimmungen und Unterschiede es zwischen dem Tauschhandel in der Prostitution und dem Tauschhandel in der Psychoanalyse gibt. Sie beantwortet diese Frage zum einen anhand der von Sigmund Freud aufgestellten Verhaltensregeln für Psychoanalytiker, die bereits einige Grenzen zur Prostitution aufweisen bzw. etablieren. Dennoch scheinen Psychoanalytiker mit der Analogie zu ringen. So interpretiert Bettina Mathes auch das Verhalten Lacans, der radikal mit Freuds Regeln brach, als einen Versuch, die eigene Käuflichkeit abzuwehren. Indirekt zeigt sie damit, dass es auch beim Handel in der Prostitution nicht nur um Sex, sondern auch um Zeit, Zuwendung und Projektionen von Fantasien geht. Trotz vieler entscheidender Unterschiede wird es Psychoanalytiker/-innen genau durch diese Übereinstimmung erschwert, sich von der Prostitution zu distanzieren.

Auf welche Weise gesellschaftliches Wissen über Sexualität und Geschlecht, das in langfristigen Prozessen historisch gewachsen ist und erhebliche kulturspezifische Unterschiede aufweist, gegenwärtige Prostitutionspolitiken bestimmt, zeigt die zweite Sektion des Bandes *Politische Regime. Ein Ländervergleich* exemplarisch an verschiedenen europäischen Ländern. Die Politikwissenschaftlerin *Birgit Sauer* stellt in ihrer Analyse »Zweifelhafte Rationalität. Prostitutionspolitiken in Österreich und Slowenien« dar, welche Bilder und Deutungsmuster, so genannte *frames*, den Prozess der Etablierung unterschiedlicher Prostitutionsregime in diesen beiden Ländern begleitet haben. Sie stellt Idealtypen von Prostitutionsregimen vor (prohibitive, abolitionistische, reglementaristische und Sexwork-Regime) und arbeitet im Rahmen einer *critical frame analysis* heraus, mithilfe welcher geschlechtlich, sexuell und moralisch codierten Deutungsmuster sich in Österreich ein reglementaristisches Prostitutionsregime etablieren



und stabilisieren konnte, während sich in Slowenien ein Übergangsregime zwischen Prohibition und Quasi-Sexarbeitssystem herauschälte.

Die Kulturwissenschaftlerin *Susanne Dodillet* geht in ihrem Beitrag »Prostitutionspolitik in Deutschland und Schweden. Zum ideologischen Hintergrund von Sexarbeit und Sexkaufverbot« den historischen Wurzeln der unterschiedlichen Prostitutionsregime in Deutschland und Schweden nach, auf die sich die Gesetzesänderungen in beiden Ländern gründen: in Schweden das Verbot, sexuelle Dienstleistungen zu »kaufen« und in Deutschland die Liberalisierung des Prostitutionsparagrafen. Ausgehend von den Argumenten, die in den deutschen und schwedischen Prostitutionsdebatten vorgetragen wurden, beleuchtet sie umfassende kulturelle und historische Unterschiede zwischen den Ländern, zum Beispiel den Einfluss von Wohlfahrtsstaatstheorien, von feministischen Ideen und die Bedeutung von Öffentlichkeit und Zivilgesellschaft.

Die staatlichen Regulierungen von Prostitution, wie sie von Birgit Sauer und Susanne Dodillet beschrieben wurden, lassen Leerstellen zurück, da sich die Regulierungen in erster Linie auf Sex-Arbeiter/-innen mit einer inländischen Staatsbürgerschaft beziehen. Unter der Überschrift *Politische Regime. Ihre ›Randbereiche‹*, der dritten Sektion des Bandes, geraten diejenigen Facetten der Prostitution in den Blick, die als ihre Grauzonen fungieren, an denen sich aber gerade deshalb umso deutlicher ablesen lässt, welches Wissen, z.B. über *race*, *class* und *gender*, den Prostitutionsdiskursen immanent ist und wie dieses Wissen praktiziert und reproduziert wird.

In ihrem rechtswissenschaftlichen Beitrag »Die Frau als ›Handelsgut‹ – (straf-)rechtliche Betrachtung des Menschenhandels in Österreich und Deutschland« analysiert die Juristin *Alice Sadoghi* die das Phänomen des »Menschenhandels« berührenden neuen strafrechtlichen Normen in beiden Staaten und arbeitet heraus, was dieses Recht in seiner Anwendung für die Betroffenen bedeutet und welche Nebenrechte dabei eine Rolle spielen. Eines ihrer Ergebnisse ist, dass auch die aktuelle Rechtslage sich nicht an der Idee einer so genannten »primären Generalprävention« orientiert. Denn der Idee des Strafrechts sei immanent, die Täter durch Verhängung von Strafen lediglich davon abzuhalten, ihre Delikte nochmals zu begehen. Stattdessen plädiert sie für eher vorbeugende Maßnahmen, wie etwa eine Reform von fremden-, ausländer- sowie einreiserechtlichen Bestimmungen, durch die die hauptsächliche Einnahmequelle des Menschenhandels, nämlich die Existenz migrationswilliger Menschen, die keinen anderen Weg zur Einreise als den Menschenhandel finden, reduziert werden könnte.

Um die Auswirkungen rechtlicher Bestimmungen geht es auch in dem sich anschließenden Beitrag »Weiße Sklavinnen in einer Kolonialnation: Die niederländische Kampagne gegen Frauenhandel im frühen 20. Jahrhundert« der Politikwissenschaftlerin *Petra de Vries*. Sie widmet sich dem Thema des Menschenhandels in historischer Perspektive, indem sie die zwischen 1900 und dem Ersten Weltkrieg lebhaft geführte Debatte um den »Weißen Sklavenhandel« und die daraufhin initiierte Veränderung der Rechtsmittel am niederländischen Beispiel betrachtet. Obwohl der Frauenhandel selbst keine Fiktion gewesen ist,

zeigt sie auf, dass die medial propagierte Figur einer »weißen Sklavin«, die aus der europäischen Heimat verschleppt wird, um in fremden Ländern zur Prostitution gezwungen zu werden, zu einer historischen Diskursfigur wurde, die die zeitgenössischen Vorstellungen von Sexualität, Geschlecht und Ethnizität in sich vereinte und zugleich nachhaltig beeinflusste.

Auch die Genderwissenschaftlerin und Diplom-Sozialarbeiterin *Kathrin Schrader* betrachtet den Konnex zwischen Geschlecht, Sexualität und Ethnizität im Wissensfeld der Prostitution. In ihrem Beitrag »Die dreifach ›Anderen‹ – Betrachtungen zur Wahrnehmung von Beschaffungsprostitution im Kontext ethnischer Konstruktionen«, erweitert sie den Fokus jedoch um den Bereich des Drogenkonsums. Sie stellt anhand einer Analyse der gegenwärtigen juristischen Rahmenbedingungen und der Bedeutung der Rechtslage für die Lebenswelt von migrierten drogenkonsumierenden Frauen dar, dass diese aufgrund ihres Verstoßes gegen gleich mehrere sozialethische Normen Prozessen der gesellschaftlichen Entrechtung und Ausgrenzung ausgeliefert sind. Die spezielle Ausprägung von Prostitution, wie sie hier zum Tragen kommt, wird durch das deutsche Prostitutionsgesetz aus dem Jahr 2001 nicht hinreichend erfasst; es schafft hingegen neue Grauzonen.

Die vierte Sektion des Bandes vertieft die Dimension der *Umkämpften Räume und Körper*. Im Beitrag »›Eine umfangreiche Konzeption, die Dirnen von den Straßen zu holen‹ – Zur Verhäuslichung der Prostitution in Frankfurt/Main« legen die Soziologinnen *Martina Löw* und *Renate Ruhne* unter Mitarbeit von *Christiane Howe* und *Regine Henn* dar, dass die Prostituierten in Frankfurt am Main zwischen 1960 und 1990 zunehmend von der Straße verdrängt und verhäuslicht wurden. Dies wird anhand der Medienberichterstattung zum Thema, ergänzt durch Sekundärliteratur-Analysen und Interviewaussagen, nachvollzogen. Verknüpft ist eine solche Verhäuslichung der Sex-Arbeiterinnen nicht nur mit Veränderungen der Machtbalancen im Feld der Prostitution selbst, sondern auch mit sich wandelnden Geschlechterverhältnissen und den Abgrenzungen sozialer Schichten voneinander.

Mit Mechanismen der Sichtbar- und Unsichtbarmachung von Prostitution befasst sich auch die Kunsthistorikerin *Romana Filzmoser*. Sie zeigt in ihrem Beitrag »Blickwechsel. Zur Bildpolitik der Berliner Prostitutionsdebatte um 1800« anhand einer Analyse von populärer Druckgrafik, wie Prostitution in Bildmedien im Übergang vom 18. zum 19. Jahrhundert durch Blicke und Blickbeziehungen sichtbar gemacht wurde. Anhand einer Bilddarstellung des »Bergerschen Tanzsaals« in Berlin, die um 1799 entstanden war, erläutert sie, wie Prostituierte durch ihre Gestik und einen direkten, auffordernden Blick, in den die »weibliche Verführungssouveränität« eingeschrieben war, von »ehrbaren« Frauen unterschieden werden konnten. Dadurch lässt sich ein Wandel der Konzeption von Prostitution aufzeigen, die im 18. Jahrhundert noch an Orte, im 19. Jahrhundert aber zunehmend an den Körper der Prostituierten gebunden war.

Unter der Überschrift »Sucht. Abgründiger Körper. Die Prostituierte als Medium der literarischen Moderne« erschließt die Literaturwissenschaftlerin *Nicola Behrmann* mit expressionistischen Texten einen gänzlich neuen Textkorpus, der sich an der Produktion und Aneignung von Wissen sowohl über die Prosti-

tution als auch die Prostituierte beteiligt hat. Sie zeigt auf, dass die Hure der modernen Metropole in der Avantgarde-Literatur zur Allegorie für die Destabilisierung eines eindeutigen weiblichen Körpers geriet, zum Krankheitserreger stilisiert und als Abschaum verworfen wurde. Sie wurde als durch billige Drogen wie Äther, Opium und Absinth beständig betäubt imaginiert. Ähnlich wie in dem Beitrag von Christina von Braun wird die Prostituierte also auch hier zum Zeichen, nicht als Verkörperung des Geldes, sondern als Zeichen eines Ortes: Sie wird zu einer räumlichen Schwelle, die es den Expressionisten erlaubt, aus der bürgerlichen Ordnung auszusteigen.

Betrachtet man die Artikel von Martina Löw und Renate Ruhne, Romana Filzmoser und Nicola Behrmann in zeitlich-chronologischer Reihenfolge, so lässt sich anhand dieser drei Artikel auch nachvollziehen, wie sich das Verhältnis von Körper und Raum für die Prostitution im Laufe von zwei Jahrhunderten komplett verändert hat: von der Gefährlichkeit der Orte zu der Gefährlichkeit der Körper, die schließlich von der Straße verdrängt und unsichtbar gemacht werden müssen.

Die nun folgende Sektion konzentriert sich gänzlich auf *Populäre mediale Diskurse* über die Prostitution. Sie wird von der Germanistin *Božena Chotuj* eröffnet, die – ausgehend von der im Dezember 2005 von Andrzej Lepper, Vize-Marschall des polnischen Sejms und Vorsitzender der rechtspopulistischen Bauernpartei Samoobrona, in den Raum geworfenen Frage »Kann man eine Prostituierte überhaupt vergewaltigen?« – Merkmale des polnischen Prostitutionsdiskurses analysiert. Schwerpunkt ihres Beitrags ist der Umgang der politischen Elite mit der Prostitution, den sie vor dem Hintergrund von Körper- und Sexualitätsauffassungen in Polen betrachtet.

Die Psychologin *Loretta Ihme* greift in ihrem Artikel »Zu Gast bei Freundinnen«. (Re)Konstruktion von Nation, Geschlecht und Sexualität in Narrativen über die Fußball-WM und die Prostitution« einen medialen Diskurs in Deutschland auf. Sie analysiert Diskursmechanismen, in denen ein Zusammenhang zwischen dem Besuch männlicher Fußballfans in Deutschland während der Fußball-Weltmeisterschaft 2006 und einem Ansteigen der so genannten Zwangsprostitution hergestellt wurde und arbeitet heraus, wie der Begriff der Zwangsprostitution hier zu einer plausiblen Redeweise werden konnte. Die Kategorien Nation, Geschlecht und Sexualität im Allgemeinen sowie Männlichkeit und männliche Sexualität im Besonderen wurden vor dem Hintergrund hegemonialer Männlichkeitskonzepte in diesem Diskurs neu verhandelt.

Welche gesellschaftliche, juristische und alltägliche Reichweite sexualwissenschaftliche Diskurse über Prostitution, Sexualität und Geschlecht erreichen konnten, gerät zum Abschluss des Bandes unter der Überschrift *Wissenschaftliche Diskurse und ihre Reichweite* zum Gegenstand der Analyse.

Mit der Genese des modernen sexualwissenschaftlichen Diskurses über Prostitution beschäftigt sich die Kulturwissenschaftlerin *Dorothea Dornhof* und legt in ihrem Artikel »Prostitution und die Harmonie der Täuschungen. Einschreibungen, kulturelle Markierungen und Verkehrungen« dar, wie die Prostitution um 1900 zu einer wissenschaftlichen Tatsache wurde, mit der die Figur der Prostituierten in ihrer kulturellen Markierung fixiert und in staatliche Kon-

trollinstanzen eingeschrieben wurde. Sie entziffert ein solches »Gestaltsehen als ausgesprochene Denkstilangelegenheit« nach Ludwik Fleck in seinen kulturellen Einschreibungen und Wahrnehmungsmustern und zeigt anhand von Filmanalysen, wie das Wissen um die Prostitution im kulturellen Bildarchiv der Moderne verortet wurde.

Dass das sexualwissenschaftliche Wissen nur von begrenzter sozialer Reichweite war und in alltäglichen Interaktionen immer wieder neu ausgehandelt werden musste, zeigt der Historiker *Stefan Wunsch* in seiner mikrohistorischen Analyse »Die Familie Sander. Prostitution, Zuhälterei und Justiz in der späten Weimarer Republik«. Er richtet den Blick darauf, wie juristisches, sexualwissenschaftliches und alltäglich-individuelles Wissen über Prostitution, weibliche Sexualität und vorbildliche Männlichkeit im Rahmen einer konkreten Gerichtssituation in Widerstreit geriet: Der homosexuelle Transvestit Anton Sander war 1931 der Zuhälterei an seiner Ehefrau Lissy angeklagt, berief sich vor Gericht jedoch darauf, dass er aufgrund seiner homosexuellen und transvestitischen Neigungen nicht als Mann im Sinne der Anklage anzusehen sei.

Der Historiker *Martin Lücke* geht in seinem Beitrag »Beschmutzte Utopien. Subkulturelle Räume, begehrte Körper und sexuelle Identitäten in belletristischen Texten über männliche Prostitution 1900-1933« der Frage nach, auf welche Weise populäre Romane, die sich in erster Linie an eine männlich-homosexuelle Leserschaft gerichtet haben, die in der Sexualwissenschaft entworfenen Konzepte von Homosexualität und männlichem Begehren aufgegriffen und umgedeutet haben. Er zeigt anhand der Darstellungen von Körperlichkeit und Sexualität in diesen Texten, dass die Autoren bemüht waren, ein sozialverträgliches Bild von Homosexualität zu zeichnen, indem die triebhaft-gefährlichen Elemente von mann-männlicher Sexualität der Sphäre der männlichen Prostitution zugewiesen wurden, während sich die literarische Formung der »gewöhnlichen« Homosexualität dadurch auszeichnet hat, dass sie als ein Raum entworfen wurde, in dem Werte wie sexuelle Treue und Kameradschaftlichkeit praktiziert wurden.

Diese letzte Sektion und damit zugleich der Band werden mit einem Aufsatz der Genderwissenschaftlerin *Sabine Grenz* abgeschlossen. In ihrem Beitrag »Prostitution, eine Verhinderung oder Ermöglichung sexueller Gewalt? Spannungen in kulturellen Konstruktionen von männlicher und weiblicher Sexualität« geht sie den beiden extremen Positionen für bzw. gegen die Prostitution nach. Dabei stellt sie fest, dass diese beiden sich diametral gegenüberstehenden Positionen ähnliche kulturelle Annahmen über Weiblichkeit und Männlichkeit beinhalten, die von den Sexualwissenschaften und benachbarten wissenschaftlichen Gebieten aufgegriffen und/oder in Umlauf gebracht wurden. Obwohl sie teilweise wissenschaftlich längst verworfen wurden, leben sie im Alltagsbewusstsein weiter fort und tragen so ebenso zu extremen Ablehnungen wie Behauptungen der kommerziellen Sexualität bei.

## Literatur

- Albuquerque, Klaus de: »Sex, Beach Boys and Female Sex Tourists in the Caribbean«, in: B. M. Dank/R. Refinetti (Hg.), *Sex Work and Sex Workers*, London 1999, S. 87-111.
- Bloch, Iwan: *Die Prostitution* Bd. I (Handbuch der gesamten Sexualwissenschaft in Einzeldarstellungen), Berlin 1912.
- Connell, Robert W.: *Der gemachte Mann. Konstruktion und Krise von Männlichkeiten*, Opladen 2000.
- Davidson, James N.: *Kurtisanen und Meersfrüchte. Die verzehrenden Leidenschaften im klassischen Athen*, Berlin 1999.
- Dudenredaktion (Hg.): *Duden. Band 1: Die deutsche Rechtschreibung*. 23., völlig neu bearbeitete Auflage, Mannheim: Dudenverlag 2004.
- Dufour, Pierre: *Weltgeschichte der Prostitution. Von den Anfängen bis zum Beginn des 20. Jahrhunderts*. Bd. 2, Reprint Frankfurt am Main 1995.
- Filters, Cornelia: »Prostitution. Echt geil?«, in: *Emma* 1993, Heft 2, S. 36-57.
- Foucault, Michel: *Der Wille zum Wissen, Sexualität und Wahrheit* Bd. 1, Frankfurt am Main 1997 [1983].
- Giesen, Rose-Marie/Schumann, Gunda: *An der Front des Patriarchats. Bericht vom langen Marsch durch das Prostitutionsmilieu*, Bensheim 1980.
- Girtler, Roland: *Strich: Sexualität als Geschäft*, München 1987.
- Grenz, Sabine: *(Un)heimliche Lust. Über den Konsum sexueller Dienstleistungen*, Wiesbaden 2005.
- Hydra (Hg.): *Freier. Das heimliche Treiben der Männer*, Hamburg 1991.
- Lücke, Martin: »Männliche Prostitution in den Debatten um eine Reform des Sexualstrafrechts zu Beginn des 20. Jahrhunderts«, in: *Invertito. Jahrbuch für die Geschichte der Homosexualitäten* 5 (2003), S. 109-121.
- Lücke, Martin: »Das ekle Geschmeiß – Mann-männliche Prostitution und hegemoniale Männlichkeit im Kaiserreich«, in: Martin Dinges (Hg.), *Männer – Macht – Körper. Hegemoniale Männlichkeiten vom Mittelalter bis heute*, Frankfurt am Main/New York 2005, S. 157-172.
- Méritt, Laura: »Club Rosa« und »Du kannst da spielen gehen, und das Geschlecht ist eigentlich egal«, in: Elisabeth v. Dücker (Hg.), *Sexarbeit. Prostitution. Lebenswelten und Mythen*, Bremen 2005.
- Millet, Kate: *Das verkaufte Geschlecht. Die Frau zwischen Gesellschaft und Prostitution*, München 1973.
- Kleiber, Dieter/Velten, Doris: *Prostitutionskunden. Eine Untersuchung über soziale und psychologische Charakteristika von Besuchern weiblicher Prostituierter in Zeiten von Aids*, Bonn 1994.
- Krafft, Sybille: *Zucht und Unzucht: Prostitution und Sittenpolizei im München der Jahrhundertwende*, München 1996.
- O'Connell Davidson, Julia: *Prostitution, Power and Freedom*, Cambridge (GB) 1998.
- Offergold, Dieter: *Erscheinungsformen, Ursachen und Auswirkungen der Prostitution in Bochum*, Diss. Bonn 1965.

- Rickard, Wendy/Storr, Merl: »Sex Work Reassessed«, in: *Feminist Review* 67 (2001), S. 1-4.
- Rothe, Andrea: *Männer, Prostitution, Tourismus, Wenn Herren reisen ...*, Münster 1997.
- Sarasin, Philipp: *Reizbare Maschinen. Eine Geschichte des Körpers 1765-1914*, Frankfurt am Main 2001.
- Schmackpfeffer, Petra: *Frauenbewegung und Prostitution*, <http://www.bis.uni-oldenburg.de/bisverlag/schfra89/inhalt.html> 1989.
- Sigusch, Volkmar: *Neosexualitäten. Über den kulturellen Wandel von Liebe und Perversion*, Frankfurt am Main/New York 2005, S. 196.
- Taylor, Jaqueline Sanchez: »A fine romance? Female Tourists' Sexual Behaviour in the Carribean«, Conference on Global Sexual Exploitation, London: Institute of Commonwealth Studies 2000.
- Velten, Doris: *Aspekte der sexuellen Sozialisation. Eine Analyse qualitativer Daten zu biographischen Entwicklungsmustern von Prostitutionskunden*, Inauguraldisertation, Freie Universität Berlin 2004.
- Wright, Michael T.: »Stricher-Leben. Sexuelle Dienstleistung oder Überlebensstrategie?« in: Elisabeth v. Dücker (Hg.), *Sexarbeit. Prostitution. Lebenswelten und Mythen*, Bremen 2005.
